# Supplementary material
Source: Springer Nature journal article supplement (https://www.springermedizin.de/resource/supplementary/12936_2008_817_MOESM1_ESM.pdf/9548998)

Eastern municipal area  
(Kruger National Park)

Town

| Town coordinates (decimal degrees) |                     |
|------------------------------------|---------------------|
| Albertsnek                         | 31,962°E, -25,664°S |
| Steenbok                           | 31,893°E, -25,746°S |
| Goba                               | 31,916°E, -25,814°S |
| Mbangwane                          | 31,890°E, -25,840°S |
| Khombaso                           | 31,878°E, -25,883°S |
| Mbuzini                            | 31,934°E, -25,924°S |
| Thambokulu                         | 31,900°E, -25,950°S |

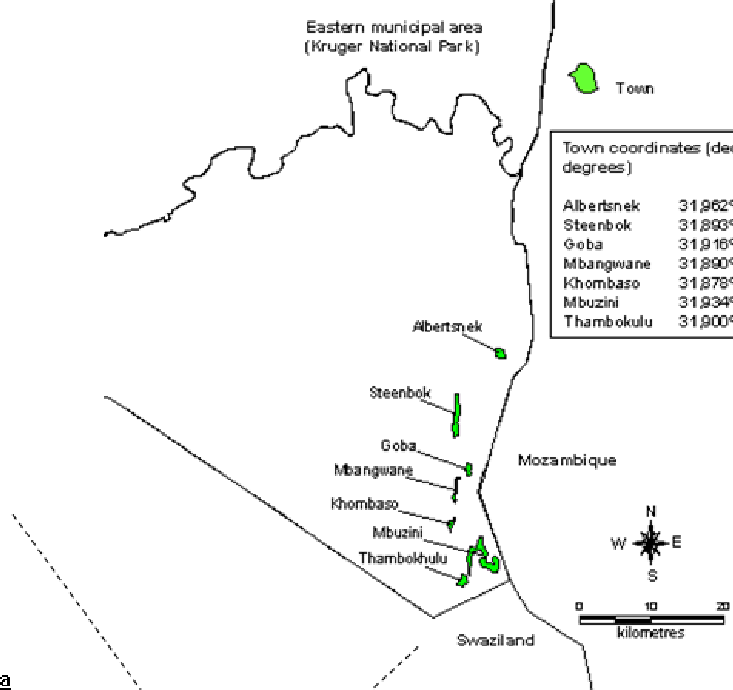

**Mpumalanga**  
**Municipal**  
**areas and**  
**bordering**  
**countries**

**South**  
**African**  
**Provinces**

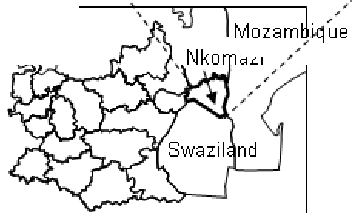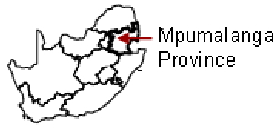

Supplement: MOESM1 [file 9548998]
